# Supplementary material
Source: publisher figshare collection journal article supplement (https://acs.figshare.com/ndownloader/files/9966631)
Supplement: Supplementary file 1 [file 9966631]

# Supporting Information

## Studying DNA G-quadruplex aptamer by $^{19}\text{F}$ NMR

Takumi Ishizuka<sup>1</sup>, Atsushi Yamashita<sup>2</sup>, Yujiro Asada<sup>2</sup> and Yan Xu<sup>1,\*</sup>

<sup>1</sup>Division of Chemistry, Department of Medical Sciences, Faculty of Medicine, University of Miyazaki, Japan.

<sup>2</sup>Department of Pathology, University of Miyazaki, Miyazaki, Japan

### General.

$^1\text{H}$ -NMR,  $^{13}\text{C}$ -NMR,  $^{19}\text{F}$ -NMR and  $^{31}\text{P}$ -NMR spectra were recorded on a BRUKER (AV-400M) magnetic resonance spectrometer. DMSO- $d_6$  and  $\text{CDCl}_3$  were used as the solvents. Coupling constants ( $J$ ) values are given in Hz and are correct to within 0.5 Hz. Signal patterns are indicated as br, broad; s, singlet; d, doublet; t, triplet; m, multiplet. All reagents were purchased from Aldrich, TCI (Tokyo Chemical Industry Co., Ltd.) or Wako (Wako Pure Chemical Industries, Ltd.). Thin layer chromatography was performed using TLC Silica gel 60 F<sub>254</sub> (Merck). Compounds were visualized by staining with a potassium permanganate solution. High-resolution mass spectra (HRMS) and electrospray ionization mass spectra (ESI-MS) were recorded on a Thermo Scientific Q Exactive instrument.

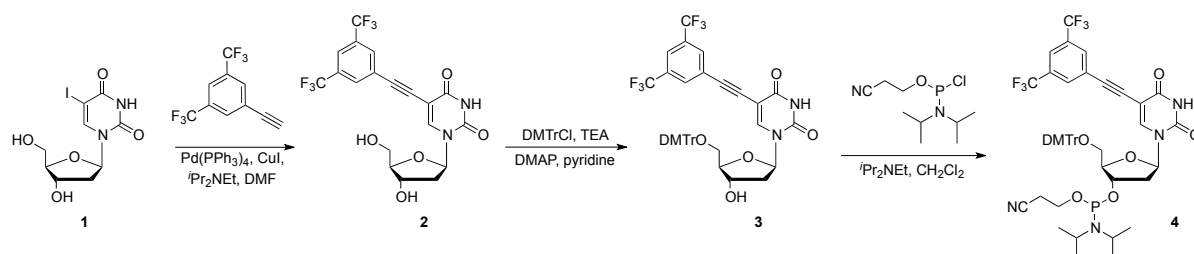

**Scheme S1** Synthetic scheme of compound **4**.

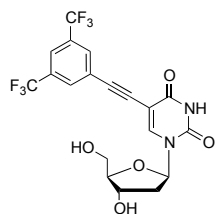

**5-ethynyl-3,5-bis(trifluoromethyl)phenyl-2'-deoxyuridine (2)** 5-Iodo-2'-deoxyuridine **1** (1.75 g, 4.9 mmol) was co-evaporated with pyridine. To a solution of **1**, tetrakis(triphenylphosphine)palladium (571 mg, 0.49 mmol), CuI (188 mg, 0.99 mmol), and *N,N*-diisopropylethylamine (1.72 ml, 9.9 mmol) in DMF (15 ml) was added 1-ethynyl-3,5-bis(trifluoromethyl)benzene (1.48 ml, 8.4 mmol). The reaction was stirred

at room temperature for 12 h. The resulting mixture was filtered through Celite, which was washed with methanol. The filtrate was concentrated *in vacuo* and methanol was added to the residue. The precipitate was removed by filtration and the filtrate was concentrated *in vacuo*.  $\text{CH}_2\text{Cl}_2$ -MeOH (1 : 1) mixture solution (100 ml) was added to the residue, and then the product was filtered and dried. This operation was performed two times to

give compound **2** (1.6 g, 70%) as a white solid.  $^1\text{H-NMR}$  (400 MHz,  $\text{DMSO-}d_6$ )  $\delta$  11.78 (s, 1H), 8.53 (s, 1H), 8.14 (s, 1H), 8.13 (s, 2H), 6.12 (t,  $J = 6.4$  Hz, 1H), 5.28 (d,  $J = 4.4$  Hz, 1H), 5.20 (t,  $J = 4.8$  Hz, 1H), 4.27 (m, 1H), 3.83 (q,  $J = 3.4$  Hz, 1H), 3.68 (ddd,  $J = 3.5, 4.9, 11.9$  Hz, 1H), 3.60 (ddd,  $J = 3.5, 4.9, 11.9$  Hz, 1H), 2.19 (dd,  $J = 5.4, 6.2$  Hz, 1H).  $^{13}\text{C-NMR}$  (100 MHz,  $\text{DMSO-}d_6$ )  $\delta$  161.20, 149.36, 145.38, 131.46, 131.06, 130.73, 130.40, 126.96, 125.10, 124.24, 121.89, 121.53, 96.97, 88.80, 87.62, 86.54, 85.08, 69.73, 60.67.  $^{19}\text{F-NMR}$  (376 MHz,  $\text{DMSO-}d_6$ )  $\delta$  -61.52. HRMS (ESI) for  $\text{C}_{19}\text{H}_{13}\text{O}_5\text{N}_2\text{F}_6$   $[\text{M-H}]^-$ : Calcd. 463.0723; Found. 463.0738.

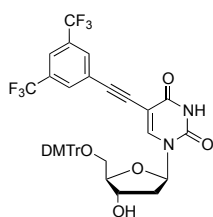

**5'-O-dimethoxytrityl-5-[(3,5-bis(trifluoromethyl)phenyl)ethynyl]-2'-deoxyuridine**

**(3)** To a compound **2** (1.6 g, 3.5 mmol) dried three times by co-evaporation of pyridine and dissolved in dry pyridine (20 ml) was added 4,4'-dimethoxytritylchloride (1.75 g, 5.2 mmol), triethylamine (432  $\mu\text{L}$ , 3.1 mmol) and 4-(dimethylamino)pyridine (16.8 mg, 0.14 mmol). After 2 h, the solution was evaporated *in vacuo*, and the residue was dissolved in

dichloromethane and added saturated  $\text{NaHCO}_3$  aq. solution. The mixture was extracted two times with dichloromethane. The organic layer was dried over  $\text{Na}_2\text{SO}_4$ , and concentrated *in vacuo*. The residue was purified by silica gel column chromatography ( $\text{CH}_2\text{Cl}_2$  :  $\text{MeOH} = 10 : 1$ ) to give the compound **3** (2.4 g, 90%) as a solid.  $^1\text{H-NMR}$  (400 MHz,  $\text{DMSO-}d_6$ )  $\delta$  11.85 (s, 1H), 8.35 (s, 1H), 8.06 (s, 1H), 7.55 (s, 2H), 7.41-7.10 (m, 9H), 6.83-6.78 (m, 4H), 6.16 (t,  $J = 6.0$  Hz, 1H), 5.37 (d,  $J = 4.4$  Hz, 1H), 4.37-4.30 (m, 1H), 3.96 (q,  $J = 3.4$  Hz, 1H), 3.62 (s, 6H), 3.24 (m, 2H), 2.39-2.26 (m, 2H). HRMS (ESI) for  $\text{C}_{40}\text{H}_{31}\text{O}_7\text{N}_2\text{F}_6$   $[\text{M-H}]^-$ : Calcd. 765.2030; Found. 765.2048.

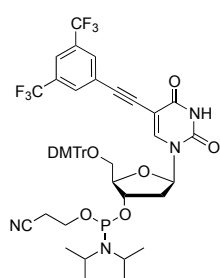

**3'-O-[(2-cyanoethoxy)(diisopropylamino)phosphino]-5'-O-dimethoxytrityl-5-[(3,5-**

**bis(trifluoromethyl)phenyl)ethynyl]-2'-deoxyuridine (4)** The compound **3** (1.15 g, 1.5 mmol) was treated with dry *N,N*-diisopropylethylamine (1.05 ml, 6.0 mmol) and 2-cyanoethyl-*N,N*-diisopropylchlorophosphoramidite (1.0 ml, 4.5 mmol) in dry dichloromethane (5 ml) and stirred at room temperature for 4 h. After addition of dichloromethane, the reaction was stopped by adding an aqueous 5%- $\text{NaHCO}_3$  solution.

The aqueous layer was extracted two times with dichloromethane. The combined organic layers were dried over  $\text{Na}_2\text{SO}_4$  and the solvent was evaporated *in vacuo*. The residue was purified by silica gel column chromatography (*n*-hex :  $\text{AcOEt} = 1 : 2$ ) to give the compound **4** (1.26 g, 87%) as a solid.  $^{31}\text{P-NMR}$  (161 MHz,  $\text{CDCl}_3$ )  $\delta$  149.03, 148.58. HRMS (ESI) for  $\text{C}_{49}\text{H}_{48}\text{O}_8\text{N}_4\text{F}_6\text{P}$   $[\text{M-H}]^-$ : Calcd. 965.3108; Found. 965.3116.

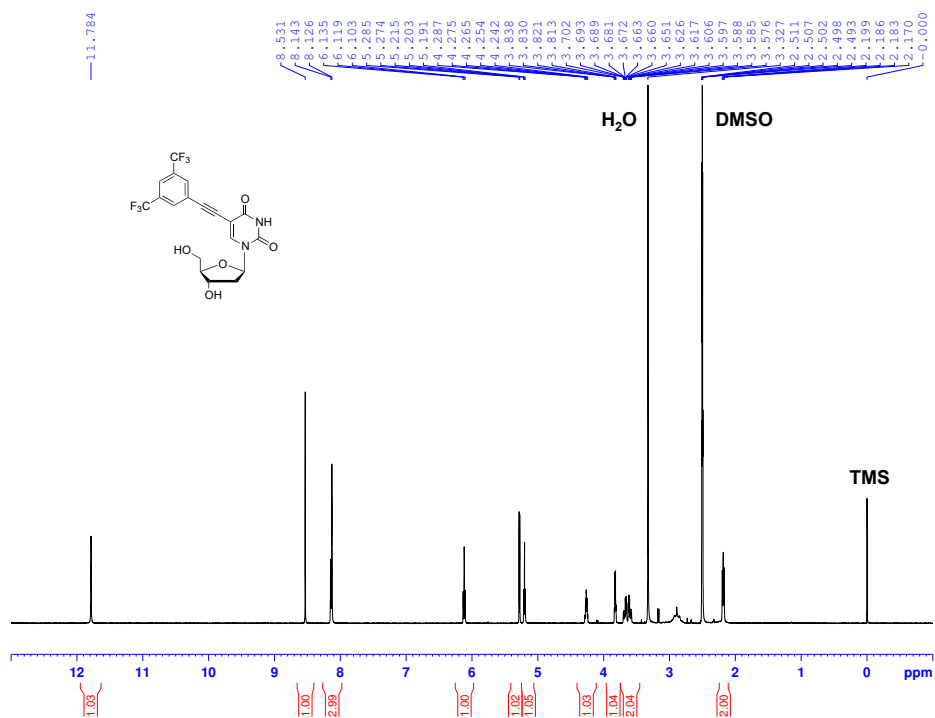

Figure S1. <sup>1</sup>H NMR spectrum of compound 2

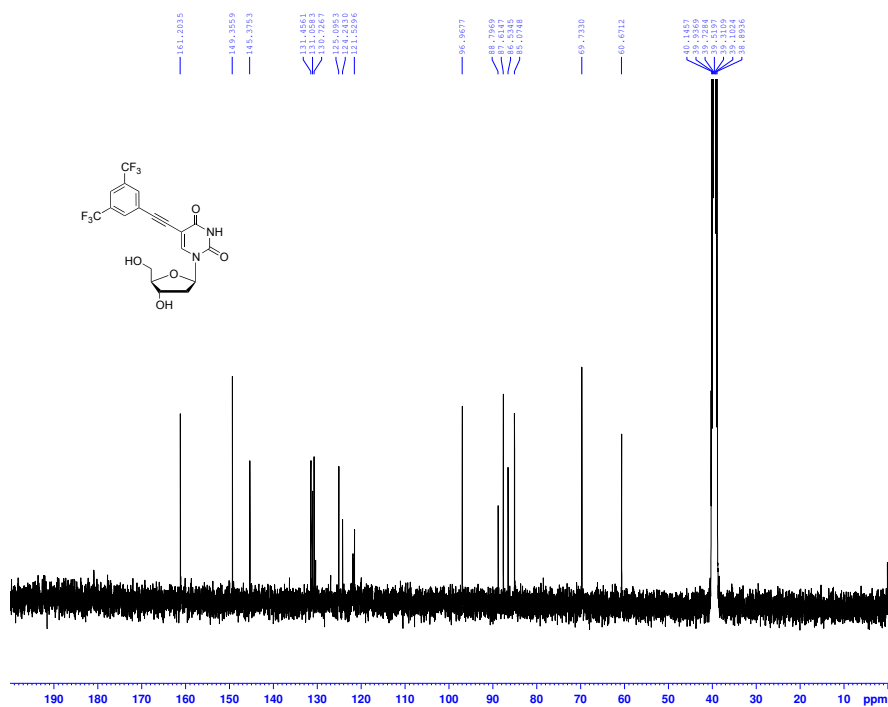

Figure S2. <sup>13</sup>C NMR spectrum of compound 2

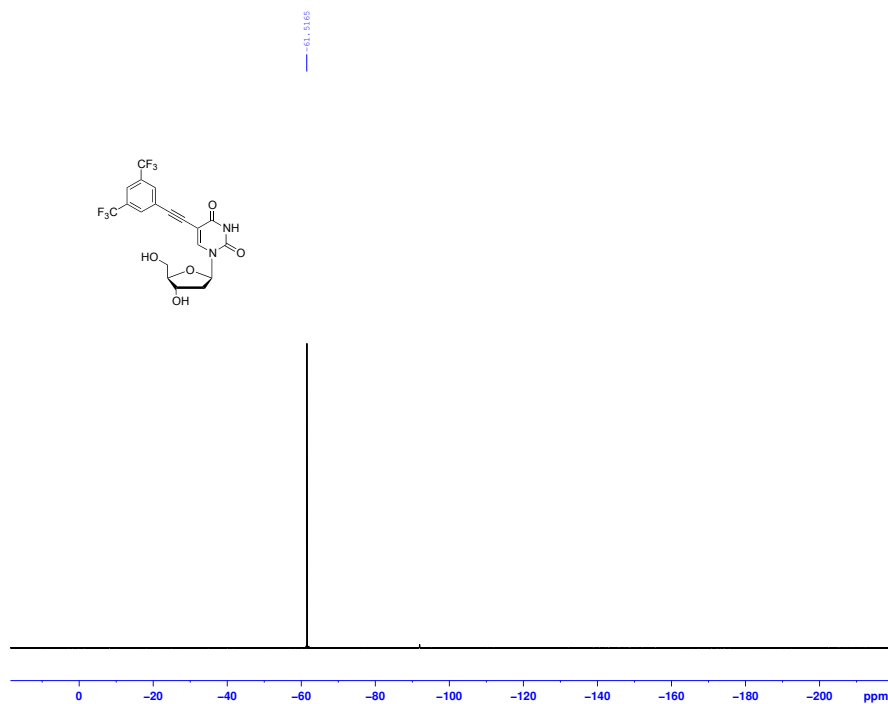

**Figure S3.**  $^{19}\text{F}$  NMR spectrum of compound 2

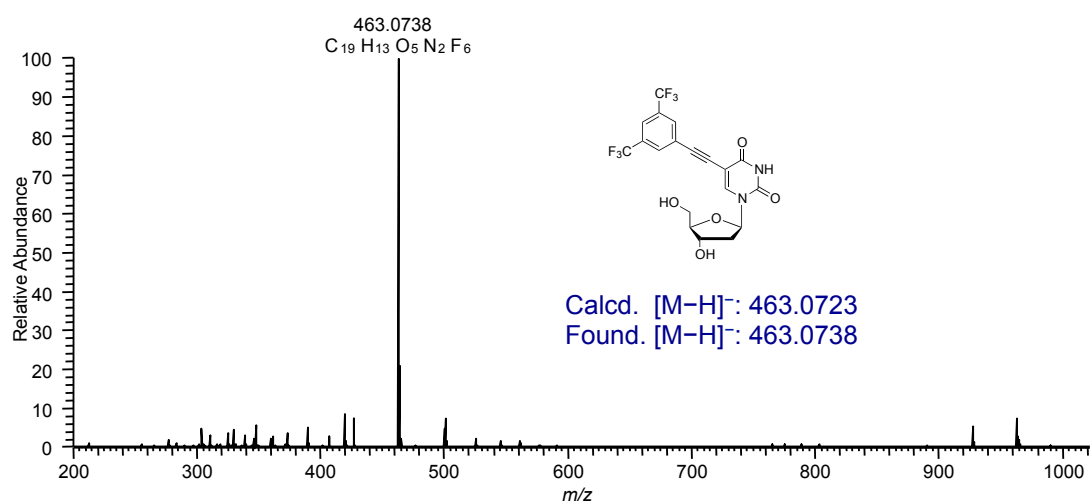

**Figure S4.** HRMS spectrum of compound 2

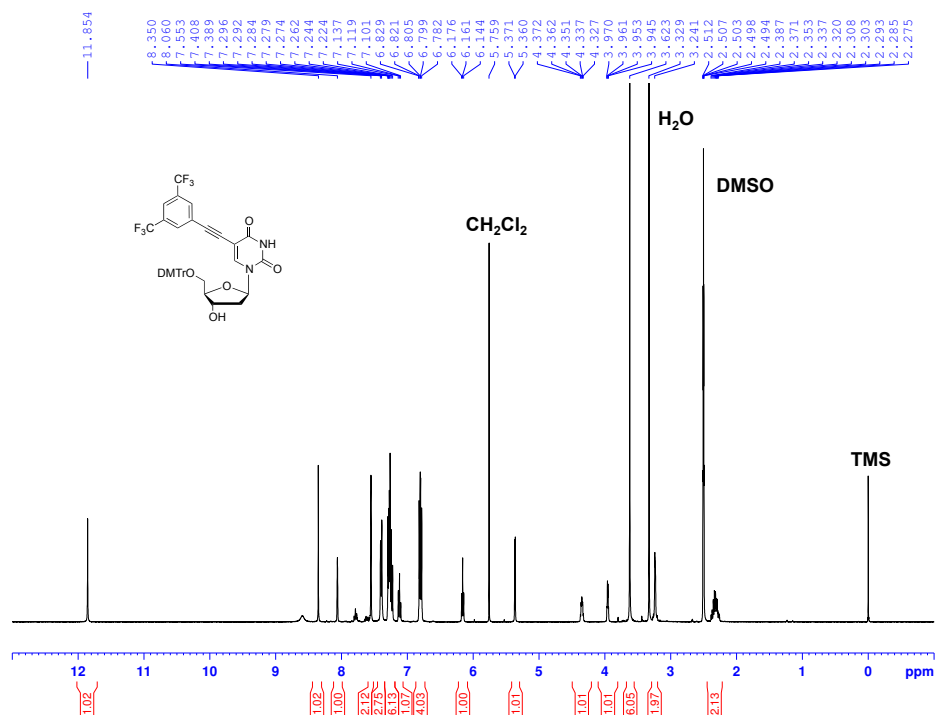

Figure S5. <sup>1</sup>H NMR spectrum of compound 3

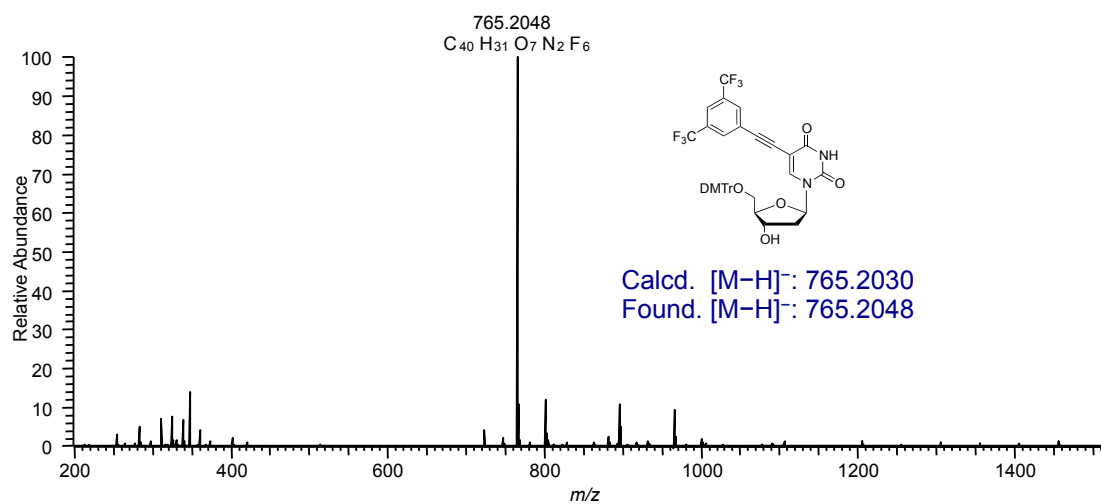

Figure S6. HRMS spectrum of compound 3

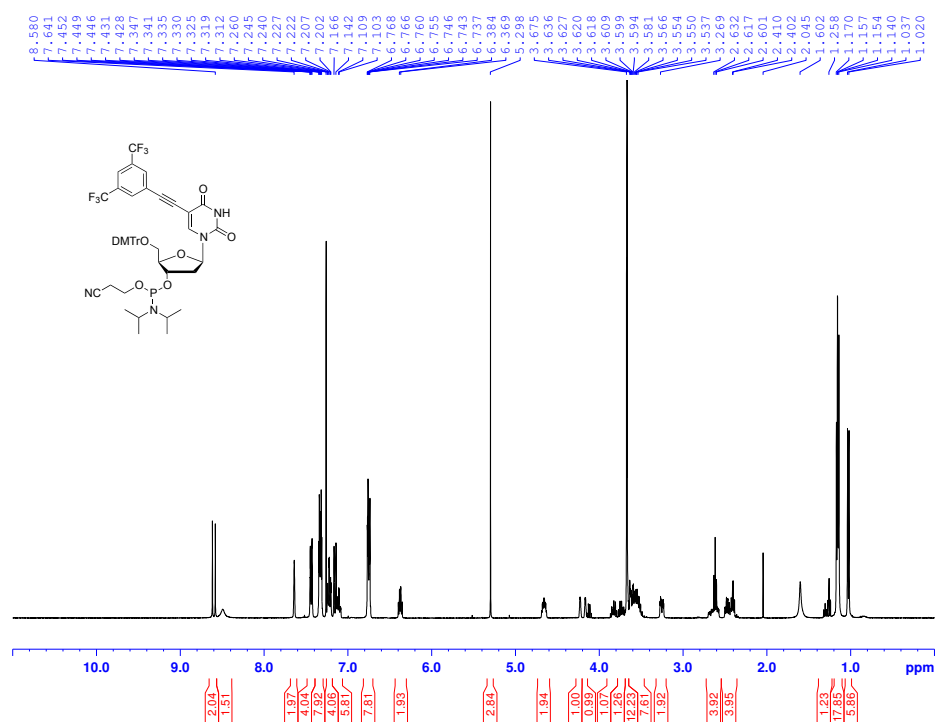

Figure S7. <sup>1</sup>H NMR spectrum of compound 4

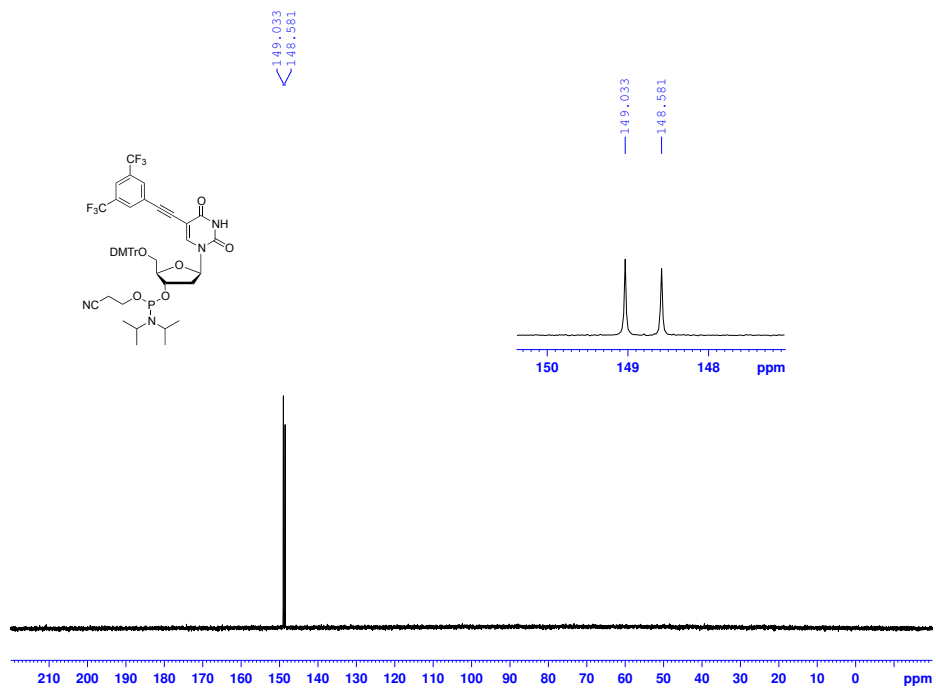

Figure S8. <sup>31</sup>P NMR spectrum of compound 4

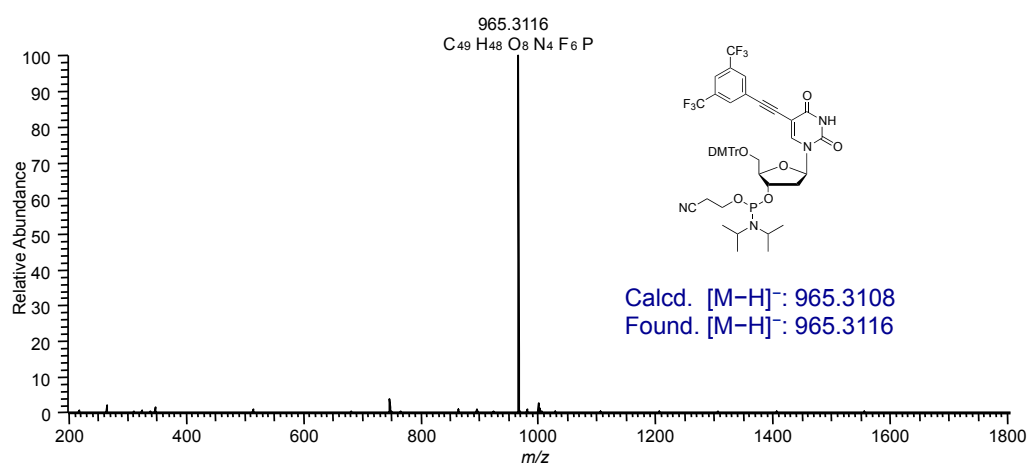

**Figure S9.** HRMS spectrum of compound 4

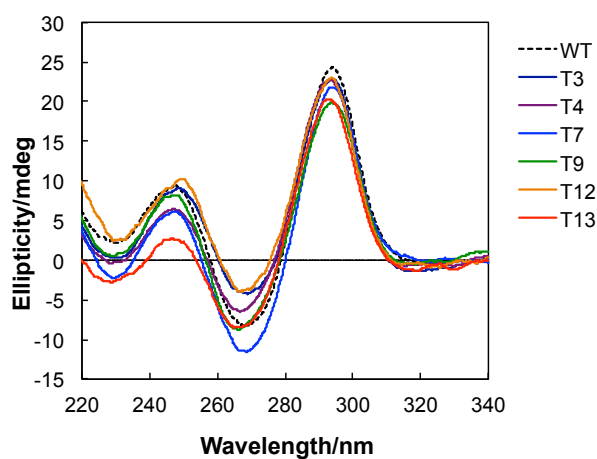

**Figure S10.** CD spectra of with and without <sup>19</sup>F-labeled oligonucleotides. Condition: [DNA] = 5 μM, [KCl] = 100 mM, [Tris-HCl (pH7.0)] = 10 mM.

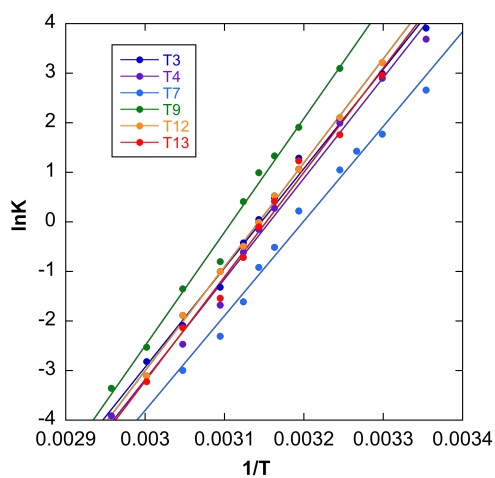

**Figure S11.** van't Hoff plots by plotting the <sup>19</sup>F-NMR peak areas.

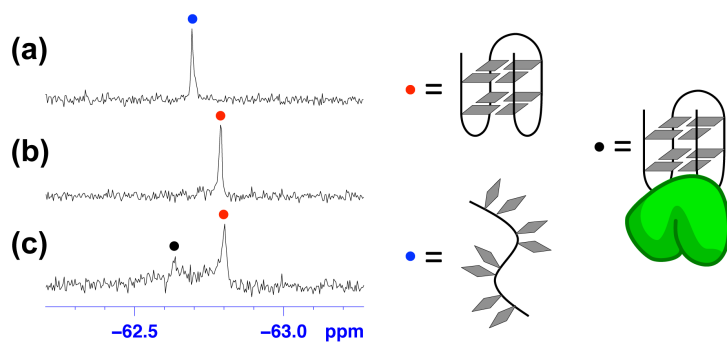

**Figure S12.** Discrimination of G-quadruplex structure and G-quadruplex-protein complex.  $^{19}\text{F}$  NMR spectra of  $^{19}\text{F}$ -labeled TBA oligonucleotide (T9) with 0 mM KCl (a), with 100 mM KCl (b) and after addition of thrombin (c). Condition: [DNA] = 100  $\mu\text{M}$ , [KCl] = 0 or 100 mM KCl, [Tris-HCl buffer (pH 7.0)] = 10 mM, [thrombin] = 10  $\mu\text{M}$ .

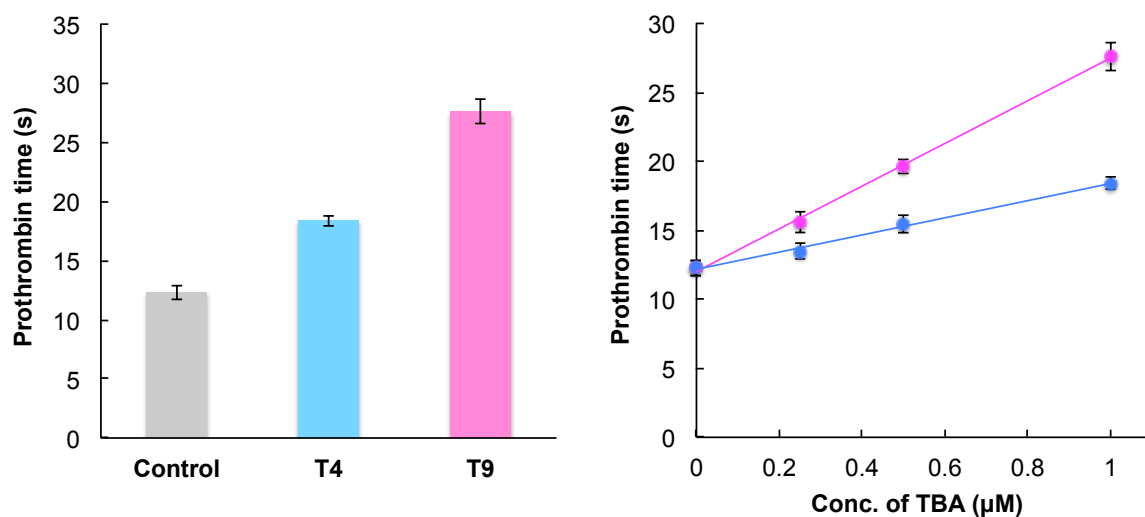

**Figure S13.** Prothrombin times measured in the presence of  $^{19}\text{F}$ -labeled TBA oligonucleotides.



**Table S1** MALDI-TOF MS of all oligonucleotides used in this study. **T** = 5-[{3,5-bis(trifluoromethyl)phenyl} ethynyl]-2'-deoxyuridine moieties

| Name | Sequences                       | Calc. MS | Found MS |
|------|---------------------------------|----------|----------|
| WT   | 5'-GGTTGGTGTGGTTGG-3'           | 4726.11  | 4725.89  |
| T3   | 5'-GG <b>T</b> TGGTGTGGTTGG-3'  | 4947.19  | 4947.33  |
| T4   | 5'-GGT <b>T</b> TGGTGTGGTTGG-3' | 4947.19  | 4946.52  |
| T7   | 5'-GGTTGG <b>T</b> GTGGTTGG-3'  | 4947.19  | 4946.54  |
| T9   | 5'-GGTTGGTGT <b>T</b> GGTTGG-3' | 4947.19  | 4947.21  |
| T12  | 5'-GGTTGGTGTGG <b>T</b> TGG-3'  | 4947.19  | 4946.67  |
| T13  | 5'-GGTTGGTGTGGT <b>T</b> GG-3'  | 4947.19  | 4946.62  |
